# Supplementary material
Source: publisher site journal article supplement (https://www.dovepress.com/article/527066)
Supplement: Supplementary file 1 [file 527066%20Supplementary%20Material.doc]

supplement material


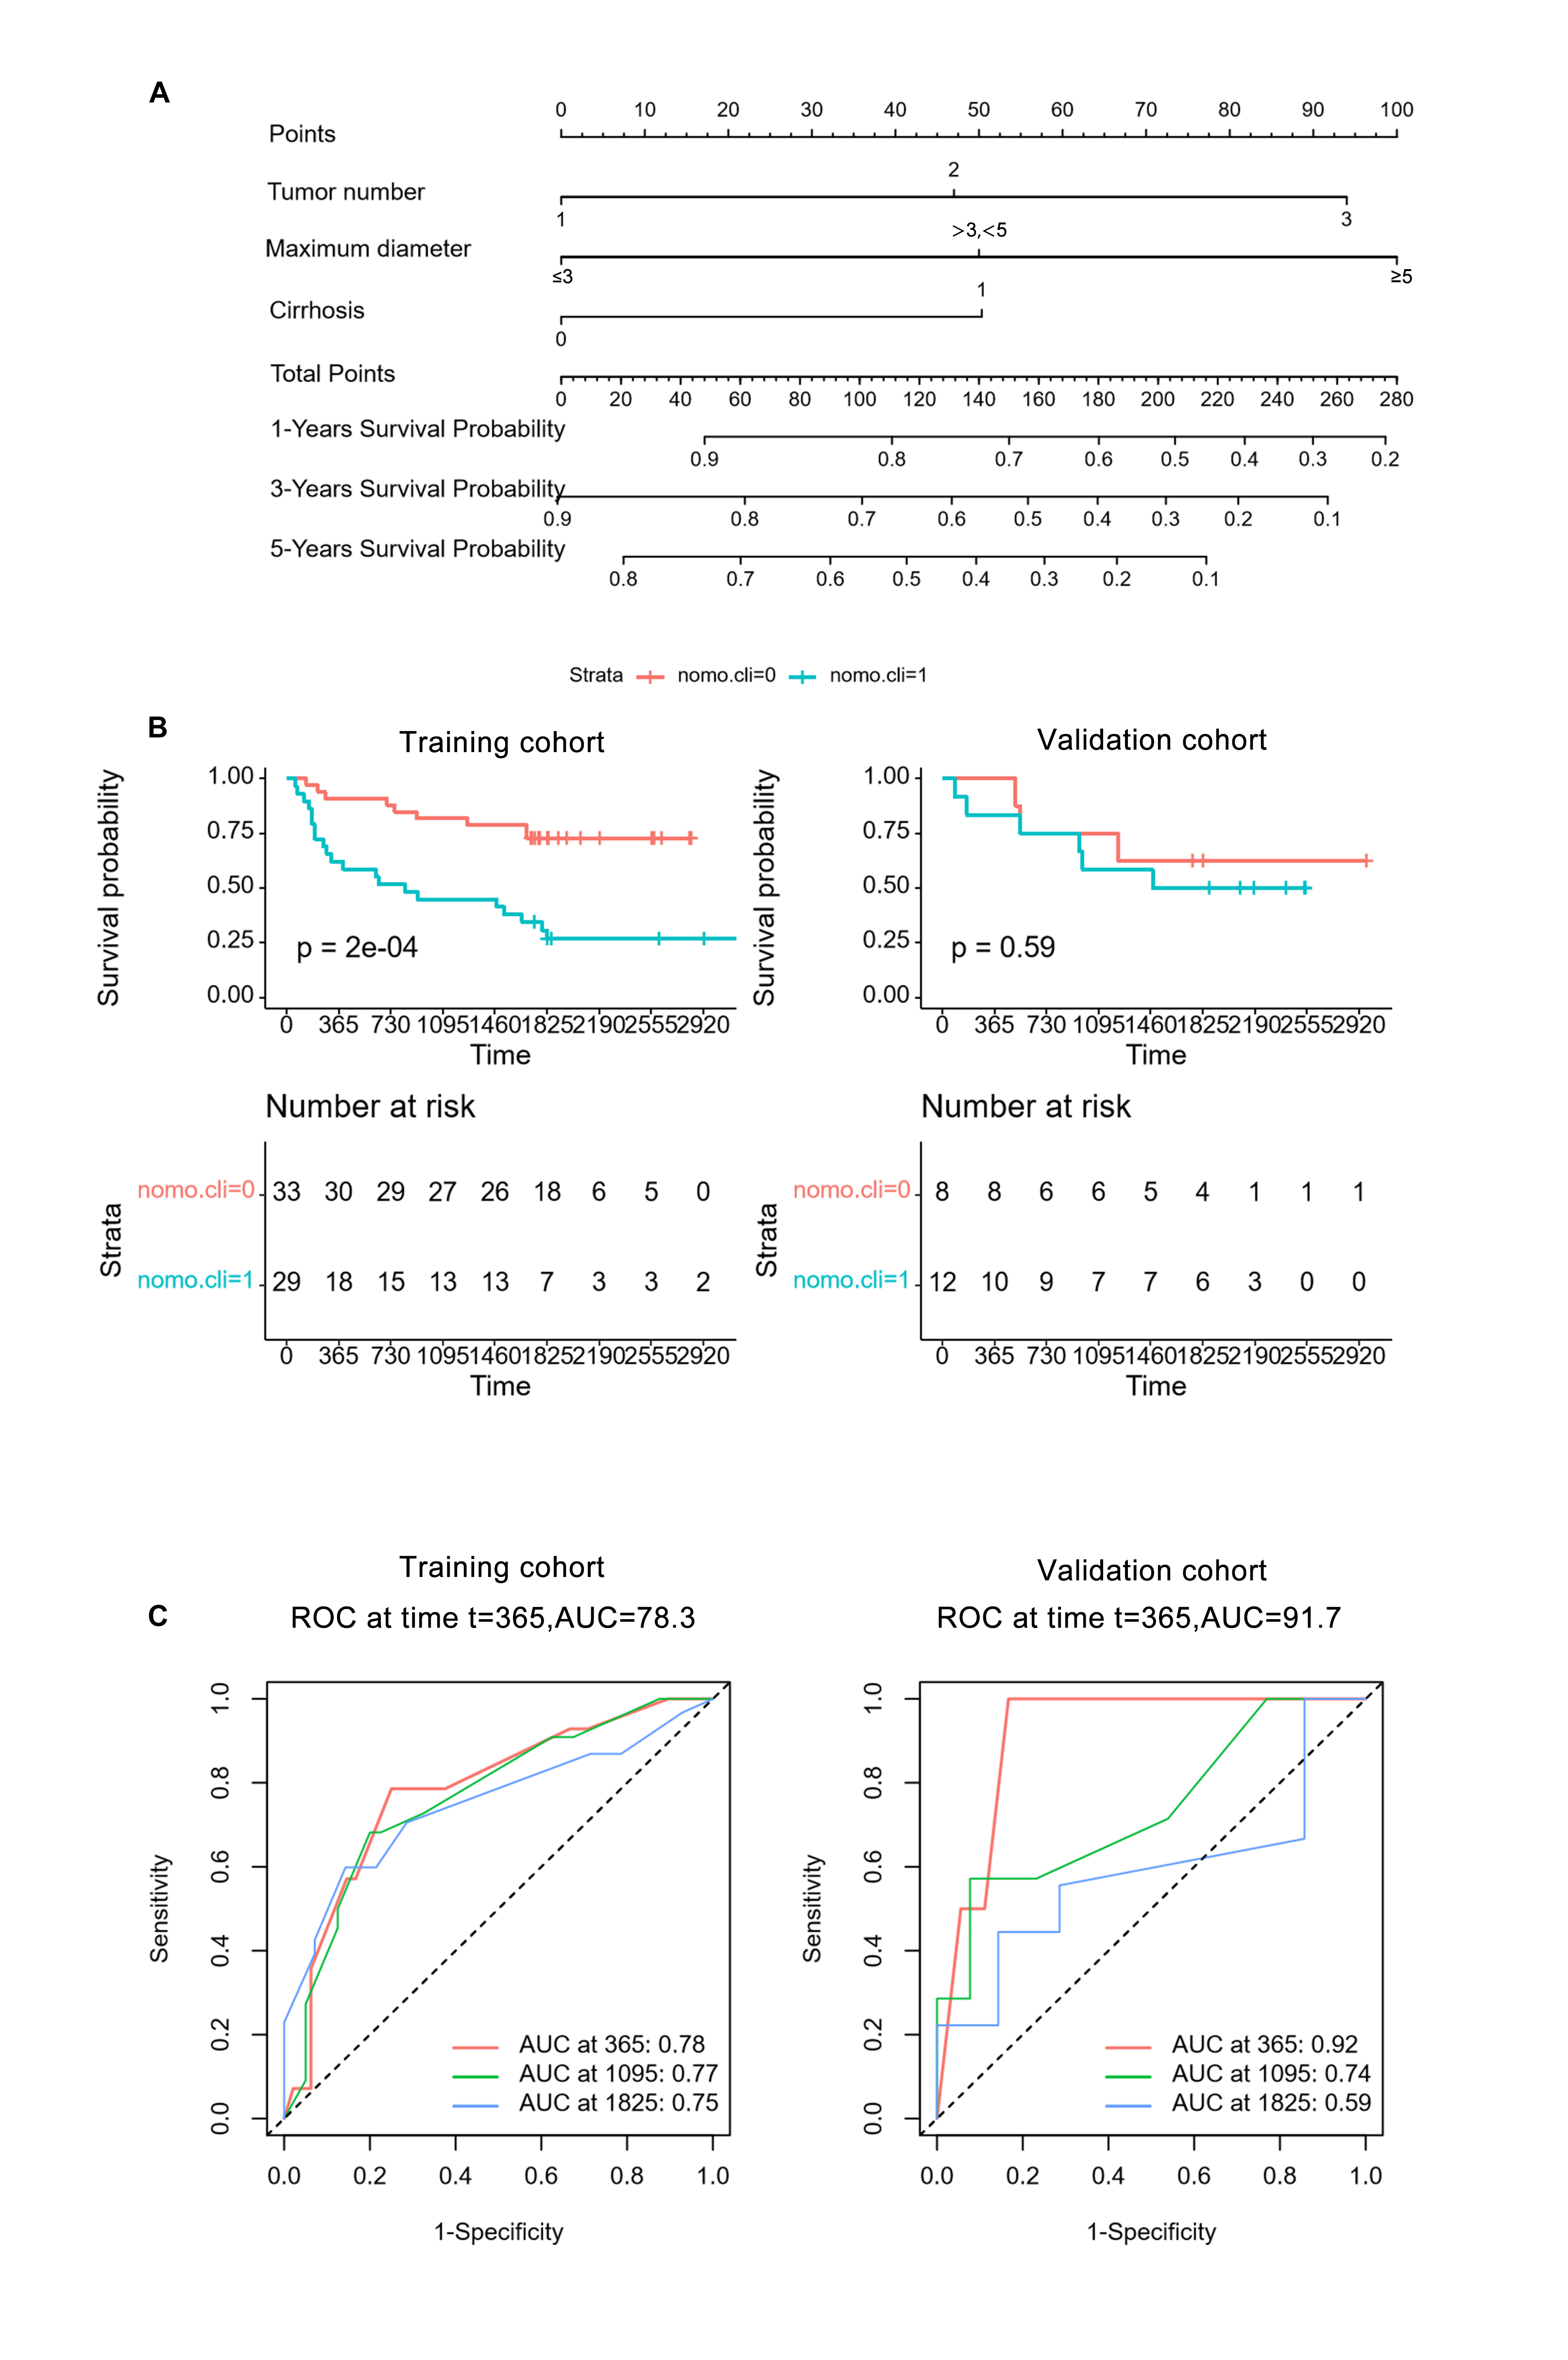


Supplementary Figure 1. Development and evaluation of the clinical model for HCC patients overall survival prediction(A-C) . The clinical nomogram was set up based on corresponding independent predictors(A). KM curves of clinical model both in the training cohort and the validation cohort(B). ROC curves(C) of clinical model for predicting the overall survival in HCC patients at 1, 3, or 5 years after surgery in the training cohort and the validation cohort.

Note. OS, overall survival; KM, Kaplan–Meier.


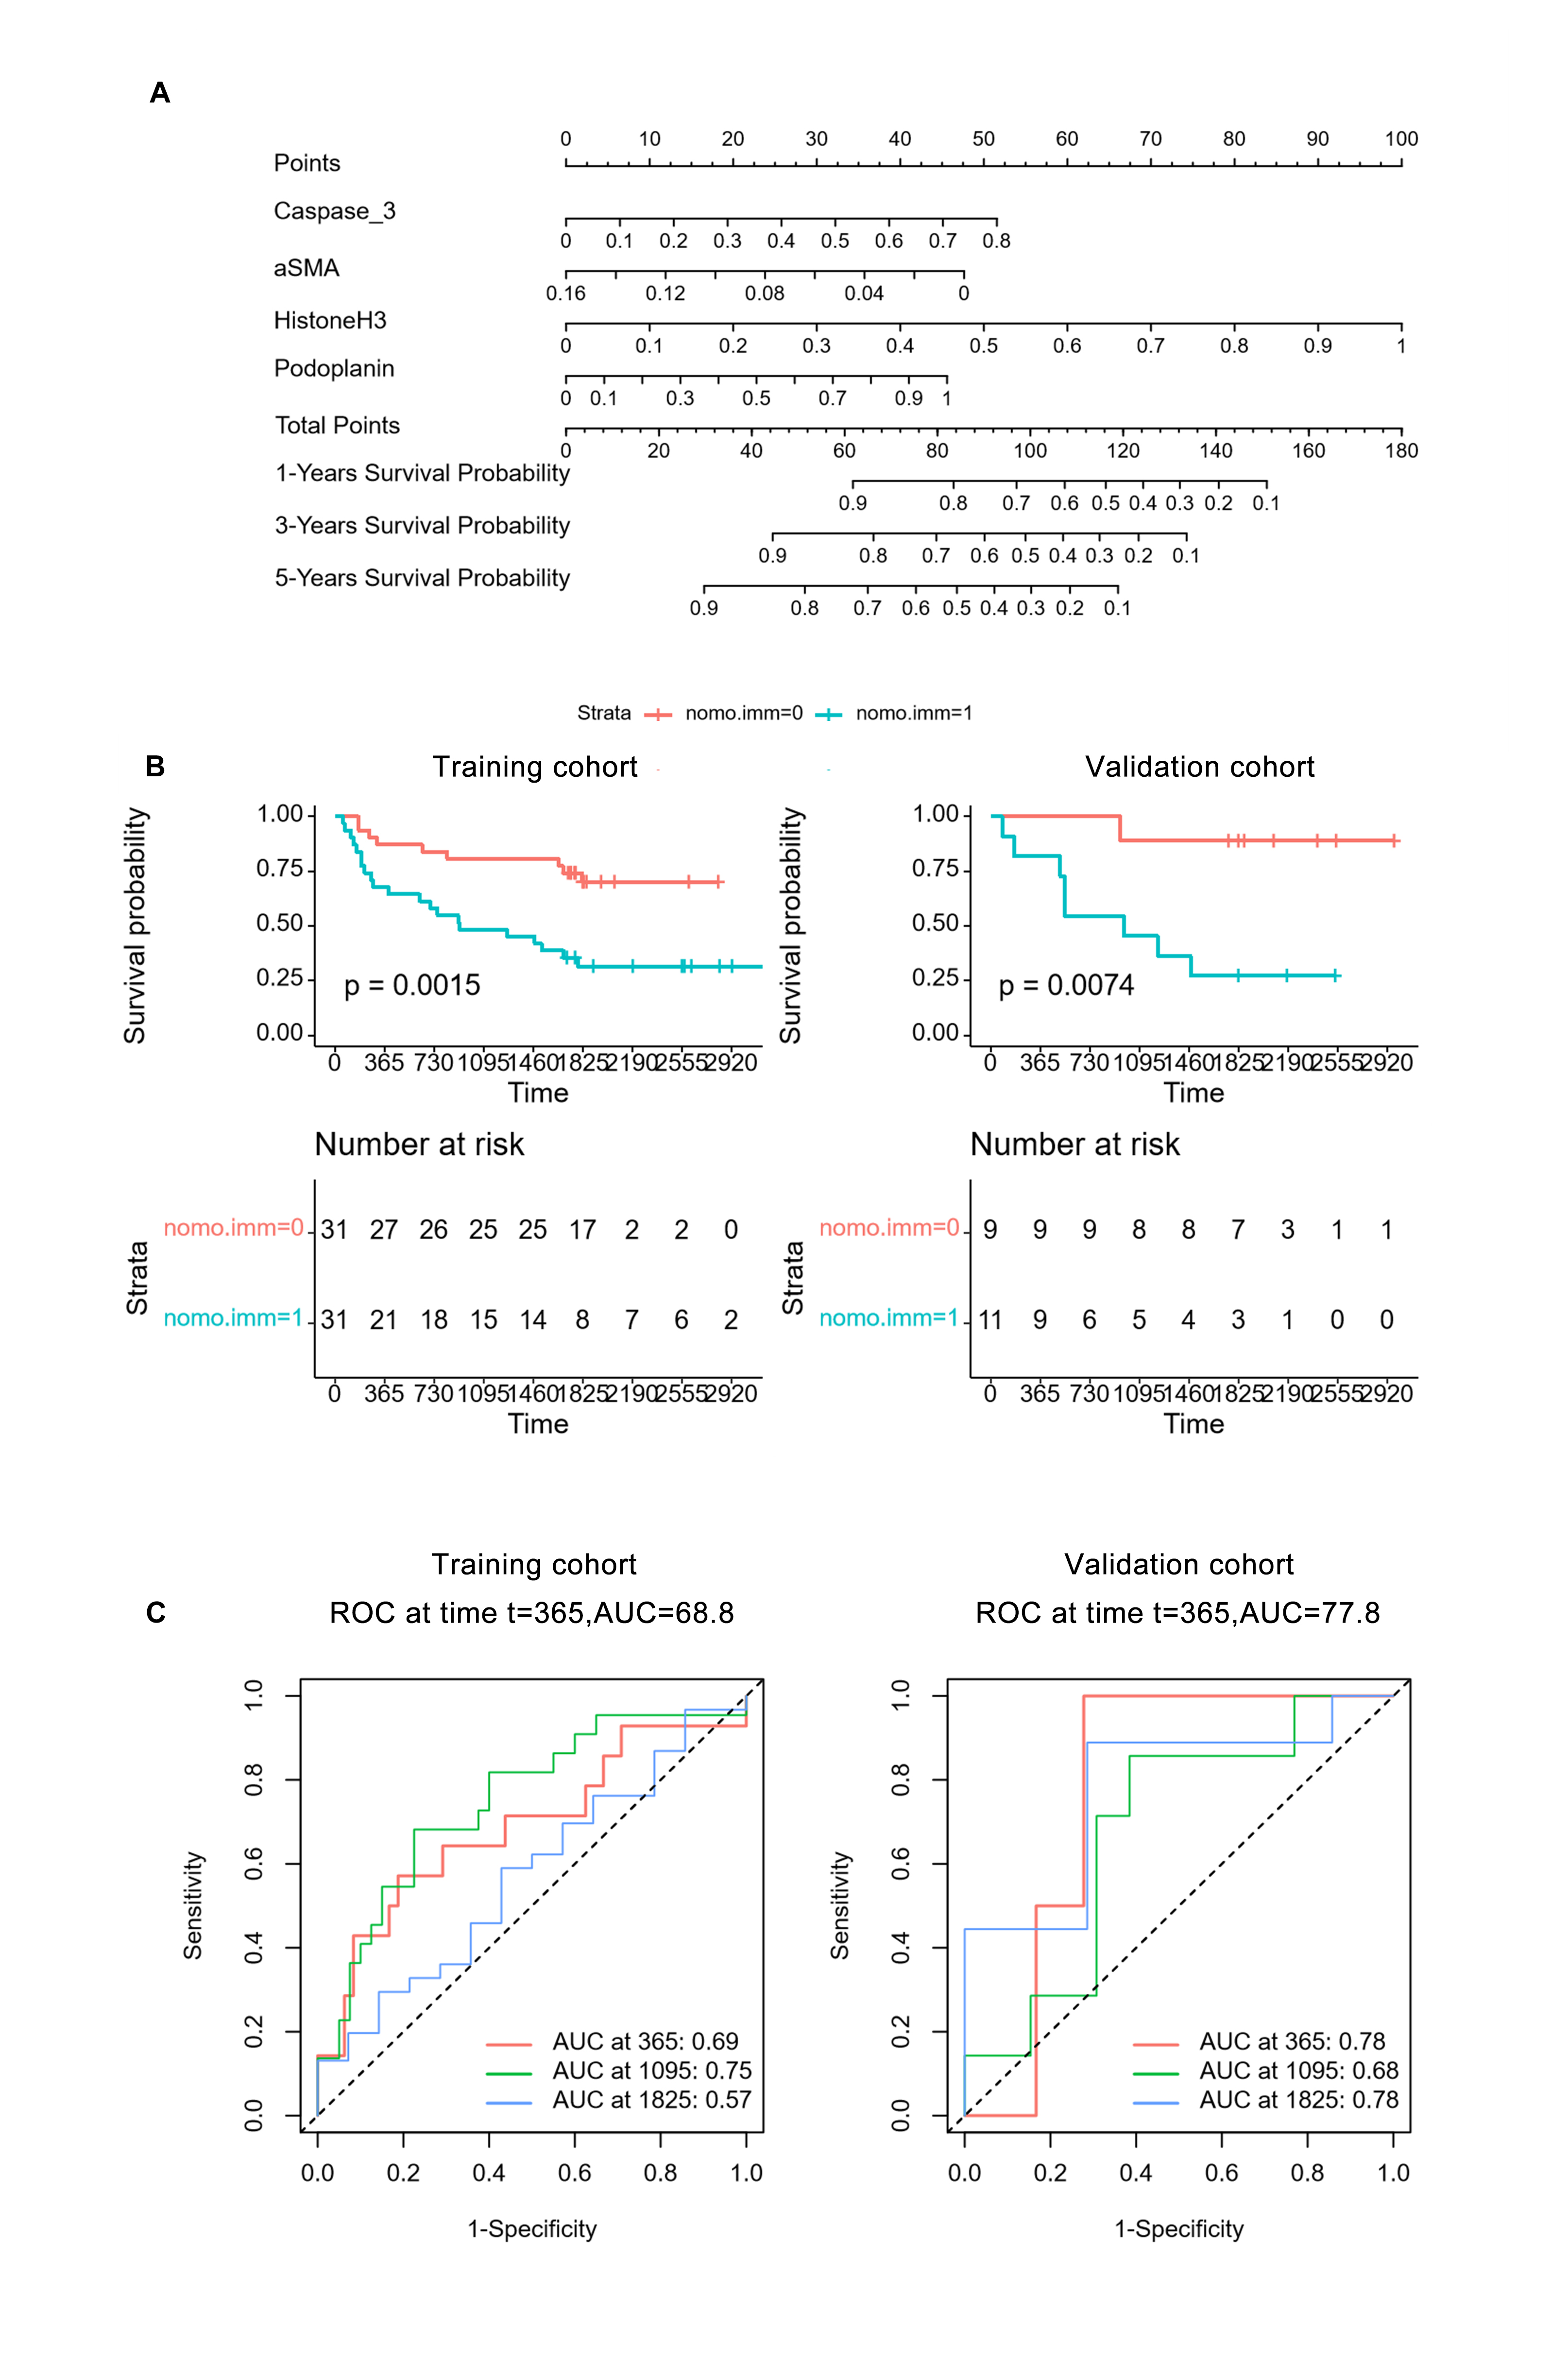


Supplementary Figure 2. Development and evaluation of the proteomics model for HCC patients overall survival prediction(A-C) . The proteomics nomogram was set up based on corresponding independent predictors(A). KM curves of proteomics model both in the training cohort and the validation cohort(B). ROC curves(C) of proteomics model for predicting the overall survival in HCC patients at 1, 3, or 5 years after surgery in the training cohort and the validation cohort.

Note. OS, overall survival; KM, Kaplan–Meier.


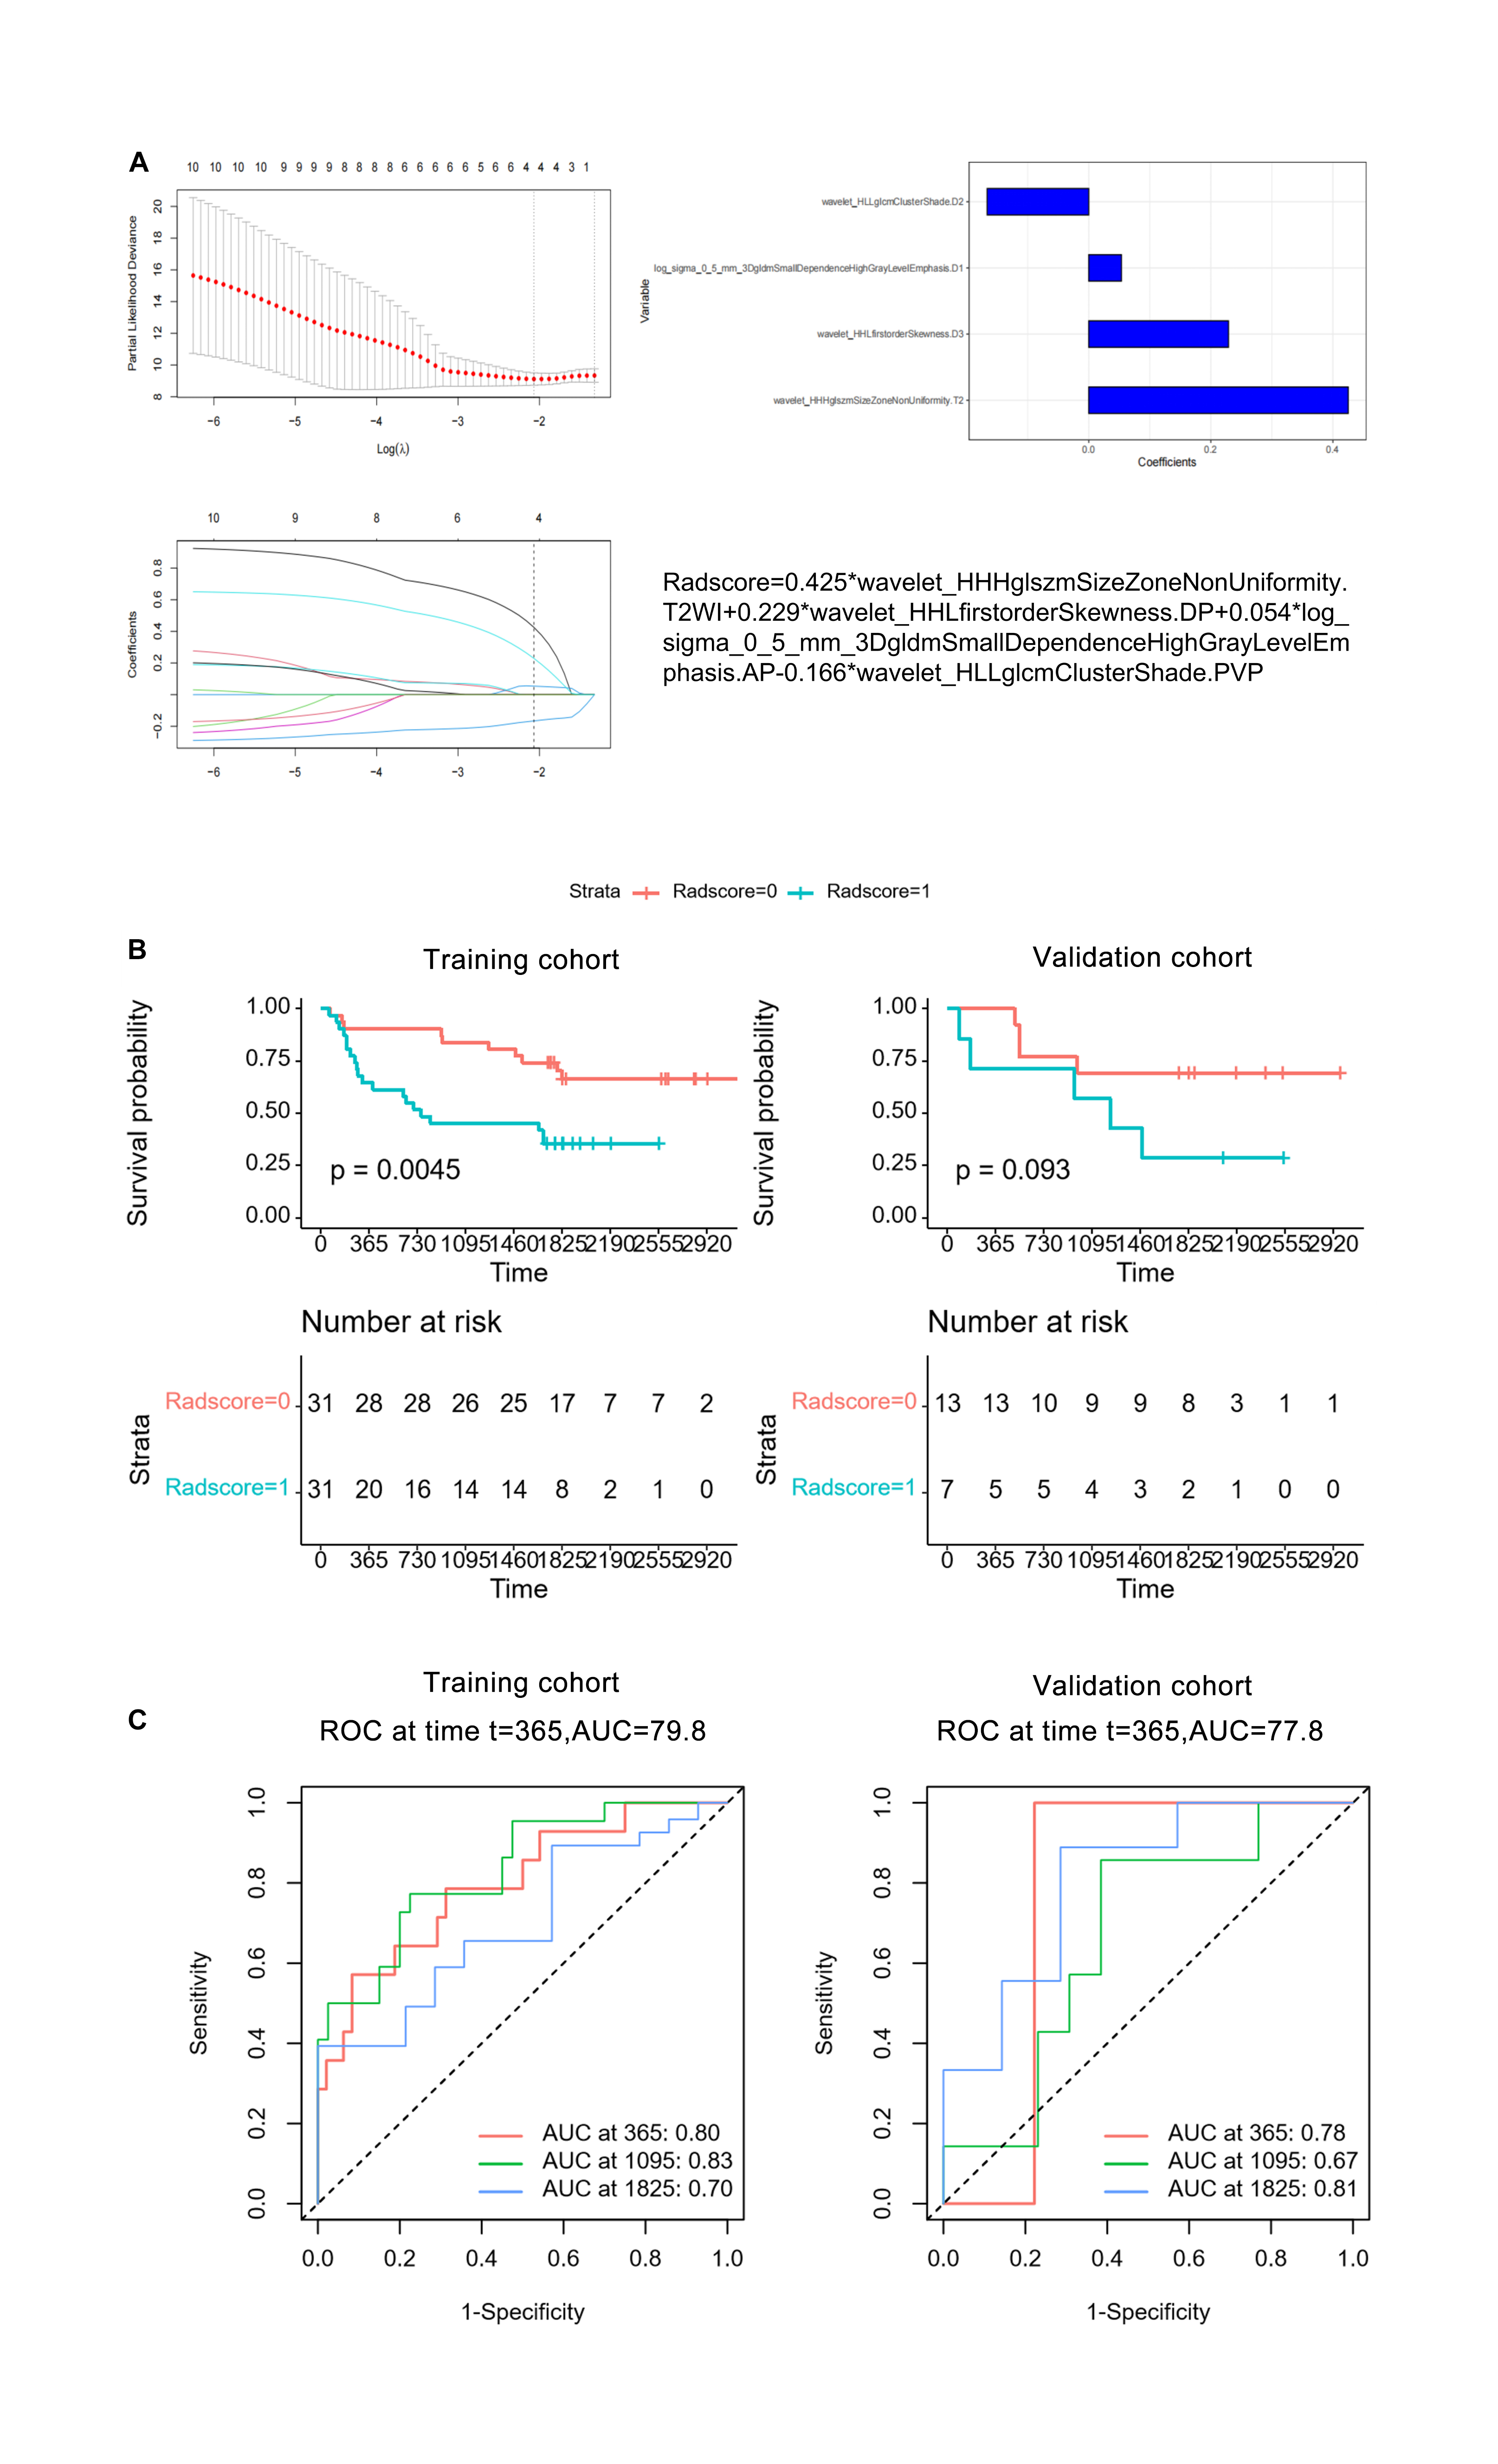


Supplementary Figure 3. Development of Radiomics score**(A)** and evaluation of the Radiomics model for HCC patients overall survival prediction**(B-C)** . KM curves of combined model both in the training cohort and the validation cohort****(B)****. ROC curves**(C)** of Radiomics model for predicting the overall survival in HCC patients at 1, 3, or 5 years after surgery in the training cohort and the validation cohort.

Note. OS, overall survival; KM, Kaplan–Meier

Supplementary Table 1. Univariate and multivariate Cox regression analysis of risk factors for clinical model

| **Risk factor** | **Univariate Cox regression analysis** | | **Multivariate Cox regression analysis** | |
| --- | --- | --- | --- | --- |
| **HR [95% CI]** | ***p value*** | **HR [95% CI]** | ***p value*** |
| Sex | 1.08[0.33; 3.57] | 0.897 |  |  |
| Age | 1.02[0.99; 1.05] | 0.193 |  |  |
| Hepatitis B virus antigen | 0.78[0.37; 1.61] | 0.496 |  |  |
| AFP | 1.18[0.77; 1.81] | 0.456 |  |  |
| BCLC stage | 1.71[1.11; 2.65] | 0.016 |  |  |
| Child-pugh score | 0.20[0.05; 0.86] | 0.031 |  |  |
| Maximum diameter | 1.78[0.96; 3.31] | 0.069 | 1.82[0.94; 3.50] | 0.074 |
| Tumor number | 1.94[1.26; 2.98] | 0.003 | 1.75[1.13; 2.72] | 0.012 |
| Portal-vein tumor thrombus | 1.58[0.48; 5.25] | 0.453 |  |  |
| Cirrhosis | 1.93[0.93; 4.02] | 0.077 | 1.82[0.86; 3.89] | 0.119 |
| Capsule | 0.53[0.18; 1.52] | 0.236 |  |  |

Note. HR, HazardRatio. CI, confidence interval. AFP, alpha-fetoprotein. BCLC, Barcelona Clinic Liver Cancer.

Supplementary Table 2. Univariate and multivariate Cox regression analysis of risk factors for proteomic model.

| **Risk factor** | **Univariate Cox regression analysis** | | **Multivariate Cox regression analysis** | |
| --- | --- | --- | --- | --- |
|  | **HR [95% CI]** | ***p* value** | **HR [95% CI]** | ***p* value** |
| Foxp3 | 3.34 [0.56; 19.76] | 0.184 |  |  |
| p-mTOR | 10.00 [1.45; 69.09] | 0.020 |  |  |
| Twist1 | 1.61 [0.14; 19.04] | 0.707 |  |  |
| PD-L1 | 1.13 [0.21; 5.99] | 0.883 |  |  |
| p53 | 3.23 [0.85; 12.30] | 0.085 |  |  |
| p-AMPK | 0.96 [0.24; 3.79] | 0.953 |  |  |
| PD1 | 1.96 [0.24; 15.80] | 0.529 |  |  |
| c-Myc | 3.97 [0.51; 30.75] | 0.187 |  |  |
| CD163 | 1.53 [0.31; 7.49] | 0.599 |  |  |
| CD45 | 40.15 [0.28; 5827.47] | 0.146 |  |  |
| HIF1α | 0.21[0.02; 2.05] | 0.180 |  |  |
| CD45RO | 729746.79 [0.40; 1.31493E+12] | 0.066 |  |  |
| CD107A | 121.52 [0.75; 19695.68] | 0.064 |  |  |
| Caspase-3 | 16.58 [1.71; 160.41] | 0.015 | 9.29[0.55;156.02] | 0.122 |
| aSMA | 2.59E-06 [1.80E-11; 0.37] | 0.034 | 0.36[0.09;1.50]* | 0.160 |
| CD21 | 57.29 [0.01; 394417.48] | 0.369 |  |  |
| CD68 | 0.02 [3.40E-07; 1515.10] | 0.504 |  |  |
| Hepar1 | 0.20 [0.03; 1.42] | 0.106 |  |  |
| HistoneH3 | 14.28 [1.11; 182.98] | 0.041 | 31.78[1.40;722.41] | 0.030 |
| Podoplanin | 3.54 [0.83; 15.03] | 0.087 | 4.84[0.96;24.48] | 0.057 |
| CD8 | 2.25593E+11 [0.55; 9.17E+22] | 0.055 |  |  |
| CD3 | 0.78 [2.96E-04; 2032.23] | 0.949 |  |  |
| Glypican3 | 0.34 [0.06; 1.83] | 0.209 |  |  |
| Keratin | 13.33 [0.20; 885.69] | 0.226 |  |  |
| CD4 | 7.17 [0.02; 2562.90] | 0.511 |  |  |
| p-S6 | 0.59 [0.04; 9.18] | 0.704 |  |  |
| KI67 | 10.12 [9.14E-11; 1.12077E+12] | 0.858 |  |  |
| Vimentin | 0.53 [0; 176.08] | 0.832 |  |  |
| E-Cadherin | 1.38 [0.13; 15.00] | 0.790 |  |  |
| HLA-DR | 7.15 [0.85; 60.01] | 0.070 |  |  |
| CD20 | 15.28 [2.48; 94.00] | 0.003 |  |  |
| CD44 | 4.05 [0.20; 81.06] | 0.360 |  |  |
| CD31 | 5.55 [0.20; 1478.80] | 0.547 |  |  |
| Pan-CK | 19.94 [0.19; 2135.95] | 0.209 |  |  |

Note. HR,HazardRatio. CI, confidence interval;

*. aSMA (×10 units): HR [95% CI]

Supplementary Table 3. The contribution of the Radiomics features to the combined model

| **Variable** | **HR[95%CI]** | ***p* value** |
| --- | --- | --- |
| wavelet_HHHglszmSizeZoneNonUniformity.T2WI | 2.33[1.40; 3.90] | 0.00117 |
| log_sigma_0_5_mm_3DgldmSmallDependenceHighGrayLevelEmphasis.AP | 1.07[0.67; 1.71] | 0.77672 |
| wavelet_HLLglcmClusterShade.PVP | 0.79[0.51; 1.23] | 0.29442 |
| wavelet_HHLfirstorderSkewness.DP | 1.87[1.25; 2.79] | 0.00234 |

Note. HR,HazardRatio. CI, confidence interval. AP, arterial phase. PVP, portal venous phase. DP,delayed phase.

**The detailed procedures of CODEX**

### **CODEX FFPE Tissue Staining and Fixation**

Formalin-fixed, paraffin-embedded (FFPE) tissues and tissue microarrays (TMAs) were utilized in this study. Tissue samples were obtained from hepatocellular carcinoma (HCC) patients treated at the Eastern Hepatobiliary Surgery Hospital. CODEX images were processed using CODEX Processor software (Akoya Biosciences, version 1.7), and protein expression within each tumor was analyzed using CODEX Multiplex Analysis Viewer (Akoya Biosciences, version 1.5.0.8).

FFPE tissue blocks were retrieved from the tissue archive of the Institute of Pathology, Eastern Hepatobiliary Surgery Hospital (EHBH), Shanghai, China. For the multi-tumor TMA, tissues were selected from the tumor regions of FFPE blocks and cored into 1-mm diameter specimens. FFPE samples were sectioned into 3-μm slices. Coverslips containing tissue sections were baked at 70°C for 1 hour, deparaffinized in xylene, rehydrated through graded ethanol series, and rinsed in ddH₂O. Following antigen retrieval, coverslips were stained with a 17-marker antibody panel in a 190-μL volume and incubated at room temperature for 3 hours.

Imaging for the CODEX multi-cycle experiment was performed using an inverted fluorescence microscope (Keyence, Osaka, Japan; Model BZ-X710) equipped with a CFI Plan Apo λ 20×/0.75 objective (Nikon, Tokyo, Japan), a microfluidics instrument (Akoya Bioscience, Menlo Park, CA, USA), and CODEX Driver software (Akoya Bioscience). DAPI nuclear staining (Akoya Bioscience, #7000003) was acquired in the final cycle.

### **CODEX Data Processing and Analysis**

Raw TIFF image files were processed using CODEX Processor (Akoya Bioscience). Seven-color overlay images with selected markers were generated in ImageJ. Protein expression analysis within each tumor was conducted using CODEX Multiplex Analysis Viewer (version 1.5.0.8).
